# Supplementary material for: Neonatal treatment philosophy in Dutch and German NICUs: health-related quality of life in adulthood of VP/VLBW infants
Source: Springer Nature journal article supplement (doi:10.1007/s11136-016-1410-7), 2016-09-22
Supplement: MOESM1 [file 10737326]

Supplement Table S2.Impact of predictors on dichotomous HRQoL measures across VP/VLBW cohorts, eligible sample

|  | Eligible sample (missings imputed) | | | | | | | |
| --- | --- | --- | --- | --- | --- | --- | --- | --- |
| Step 1 | | | | Step 2 | | | |
| Odds | 95% CI | | *p* | Odds | 95% CI | | *p* |
| **HUI3** |  |  |  |  |  |  |  |  |
| Cohort | 1.40 | 0.98 | 1.99 | .062 | 1.22 | 0.83 | 1.82 | .306 |
| GA | 0.98 | 0.91 | 1.06 | .611 | 0.99 | 0.92 | 1.07 | .777 |
| Weight | 1.00 | 1.00 | 1.00 | .894 | 1.00 | 1.00 | 1.00 | .725 |
| Sex | 1.08 | 0.81 | 1.46 | .587 | 1.13 | 0.83 | 1.53 | .426 |
| Ventilation | 1.00 | 0.99 | 1.01 | .834 | 1.00 | 0.99 | 1.01 | .686 |
| Hospital | 0.99 | 0.99 | 1.00 | .075 | 0.99 | 0.99 | 1.00 | .158 |
| Edu_high |  |  |  |  | 0.93 | 0.61 | 1.42 | .742 |
| Edu_low |  |  |  |  | 1.18 | 0.87 | 1.60 | .279 |
| IQ |  |  |  |  | 1.02 | 1.01 | 1.03 | **.001** |
| *R²* | 2.5% | | | | 5.5% | | | |
| Δ*R²* | 2.5% | | | | 3.0% | | | |
| **LHS** |  |  |  |  |  |  |  |  |
| Cohort | 1.01 | 0.75 | 1.35 | .965 | 0.82 | 0.60 | 1.14 | .234 |
| GA | 0.99 | 0.92 | 1.06 | .707 | 1.00 | 0.93 | 1.08 | .993 |
| Weight | 1.00 | 1.00 | 1.00 | .664 | 1.00 | 1.00 | 1.00 | .405 |
| Sex | 1.02 | 0.80 | 1.31 | .857 | 1.08 | 0.84 | 1.40 | .542 |
| Ventilation | 0.99 | 0.98 | 1.00 | .060 | 1.00 | 0.98 | 1.01 | .425 |
| Hospital | 0.99 | 0.99 | 1.00 | .066 | 1.00 | 0.99 | 1.00 | .281 |
| Edu_high |  |  |  |  | 0.81 | 0.49 | 1.33 | .390 |
| Edu_low |  |  |  |  | 1.09 | 0.72 | 1.65 | .684 |
| IQ |  |  |  |  | 1.03 | 1.02 | 1.04 | **<.001** |
| *R²* | 2.7% | | | | 9.4% | | | |
| Δ*R²* | 2.7% | | | | 6.8% | | | |
| **WHOQOL-BREF** |  |  |  |  |  |  |  |  |
| Cohort | 1.63 | 1.18 | 2.24 | **.003** | 1.42 | 1.02 | 1.96 | **.035** |
| GA | 0.98 | 0.90 | 1.06 | .621 | 0.99 | 0.91 | 1.07 | .747 |
| Weight | 1.00 | 1.00 | 1.00 | .589 | 1.00 | 1.00 | 1.00 | .443 |
| Sex | 1.09 | 0.77 | 1.55 | .606 | 1.14 | 0.79 | 1.65 | .475 |
| Ventilation | 1.00 | 0.99 | 1.01 | .997 | 1.00 | 0.99 | 1.02 | .587 |
| Hospital | 0.99 | 0.99 | 1.00 | .165 | 1.00 | 0.99 | 1.00 | .326 |
| Edu_high |  |  |  |  | 0.84 | 0.57 | 1.23 | .356 |
| Edu_low |  |  |  |  | 1.25 | 0.87 | 1.80 | .225 |
| IQ |  |  |  |  | 1.02 | 1.01 | 1.03 | **<.001** |
| *R²* | 3.0% | | | | 6.5% | | | |
| Δ*R²* | 3.0% | | | | 3.4% | | | |

*Note.* Cohort: 0 = German, 1 = Dutch; GA = gestational age; weight = birth weight; sex: 0 = male, 1 = female; hospital = duration hospitalisation; edu_high = high education; edu_low = low education; IQ = intelligence; odds = odds ratio; CI = confidence interval; R2 = pseudo R2 (Nagelkerke)
